# Supplementary material for: The role of mTOR signalling in the regulation of skeletal muscle mass in a rodent model of resistance exercise
Source: PubMed Central journal article supplement (PMC4977552; doi:10.1038/srep31142), 2016-08-09
Supplement: srep31142-s1.pdf [file srep31142-s1.pdf]

The role of mTOR signalling in the regulation of skeletal muscle mass in a rodent model of resistance exercise

Riki Ogasawara<sup>1,2,\*</sup>, Satoshi Fujita<sup>3</sup>, Troy A. Hornberger<sup>4</sup>, Yu Kitaoka<sup>2</sup>, Yuhei Makanae<sup>3</sup>, Koichi Nakazato<sup>5</sup>, Naokata, Ishii<sup>2</sup>

<sup>1</sup>Department of Life Science and Applied Chemistry, Nagoya Institute of Technology, Nagoya, Japan

<sup>2</sup>Department of Life Sciences, The University of Tokyo, Tokyo, Japan

<sup>3</sup>Department of Sport and Health Science, Ritsumeikan University, Kusatsu, Japan

<sup>4</sup>Department of Comparative Biosciences, School of Veterinary Medicine, University of Wisconsin-Madison, Madison, Wisconsin, USA

<sup>5</sup>Department of exercise physiology, Nippon Sport Science University, Tokyo, Japan

\*ogasawara.riki@nitech.ac.jp

Fig. S1

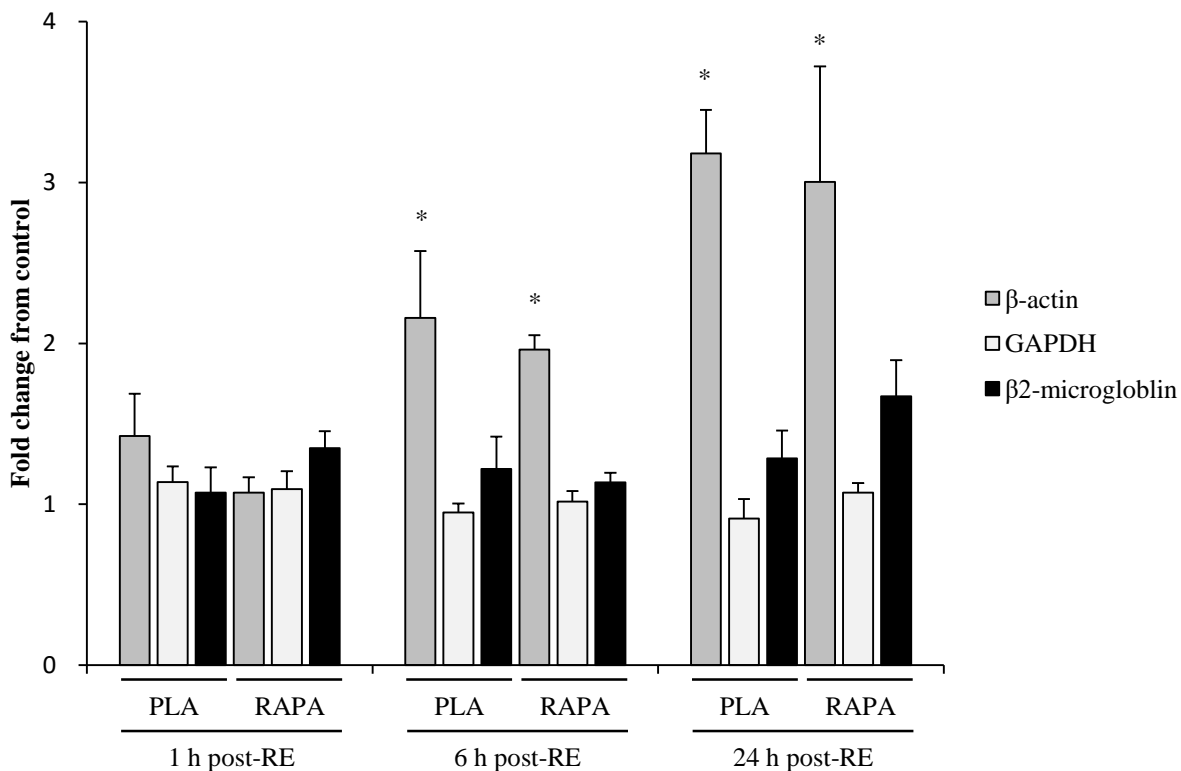

**Figure S1.** The effect of acute RE and rapamycin administration on mRNA expression of  $\beta$ -actin, GAPDH, and  $\beta$ 2-microglobulin. RE, resistance exercise; RAPA, rapamycin; PLA, placebo. Values in the graphs are means + SE. \* $P < 0.05$  vs. no exercise control muscle in the same group.

Fig. S2

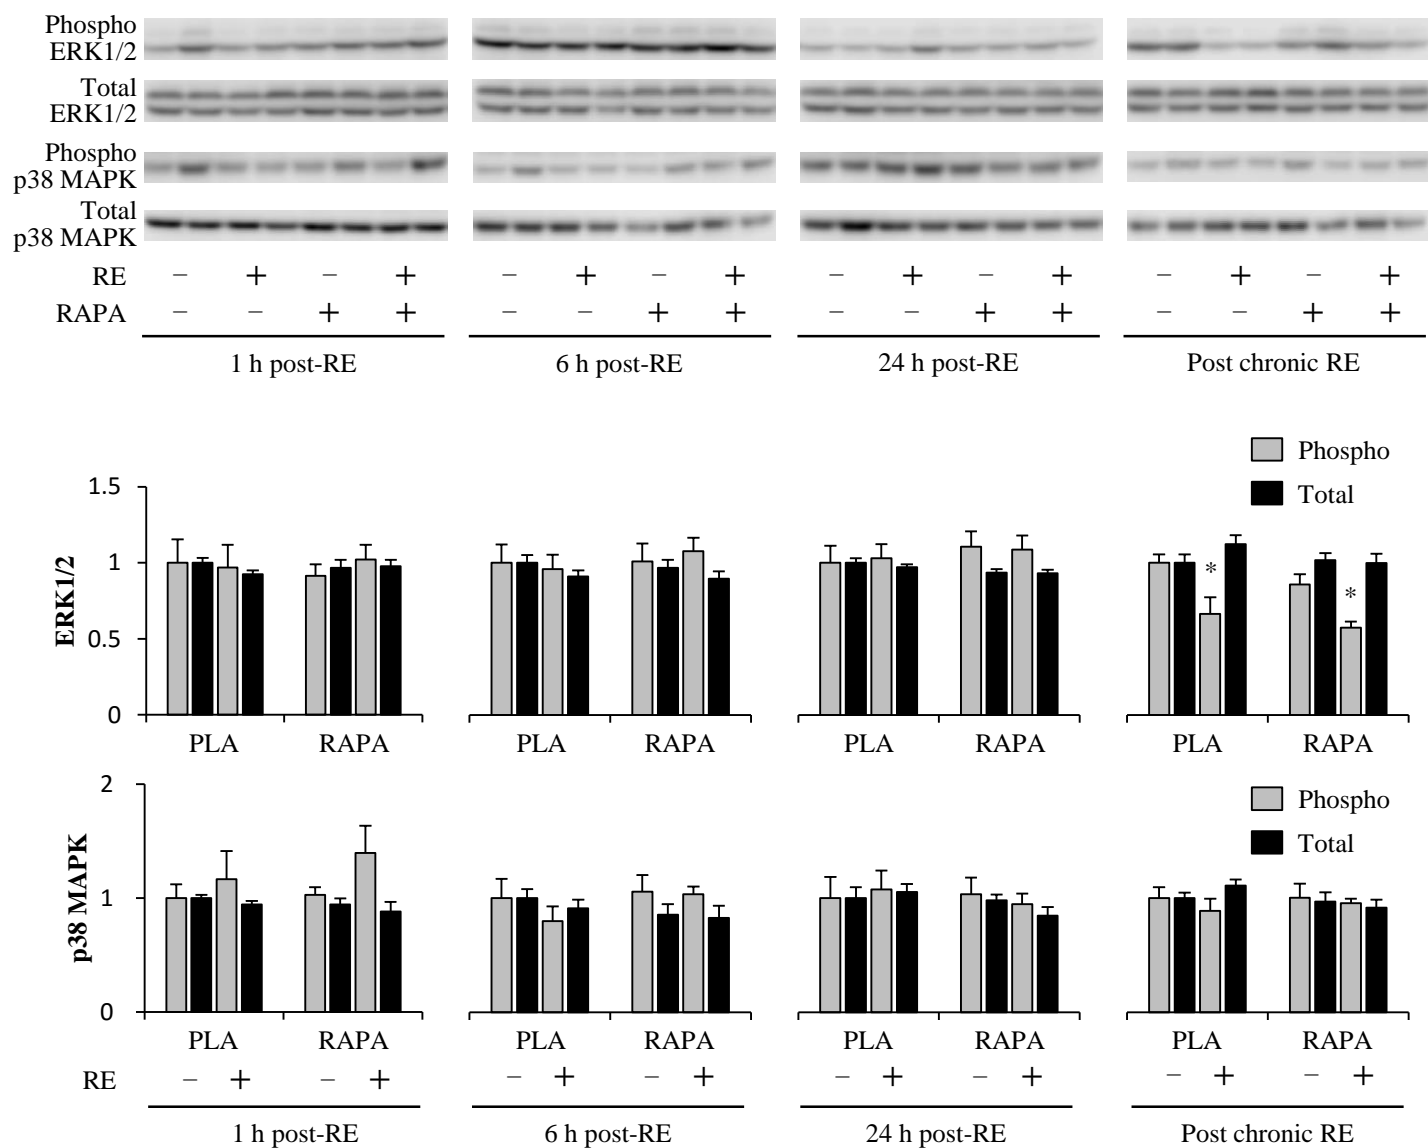

**Figure S2.** The effect of RE and rapamycin administration on the phosphorylation and total protein content of ERK1/2 and p38 MAPK. RE, resistance exercise; RAPA, rapamycin; PLA, placebo. Values in the graphs are means + SE. \* $P < 0.05$  vs. no exercise control muscle in the same group.
